# Supplementary material
Source: Springer Nature journal article supplement (https://www.springermedizin.de/resource/supplementary/12958_2009_619_MOESM2_ESM.pdf/9568114)

**A** Relative expression of CYP19A1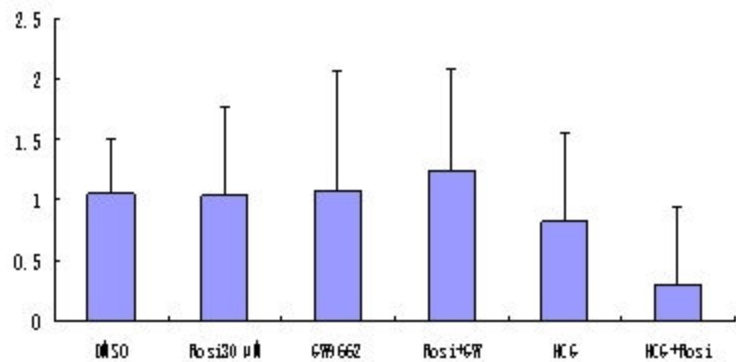**B** Relative expression of 3beta-HSD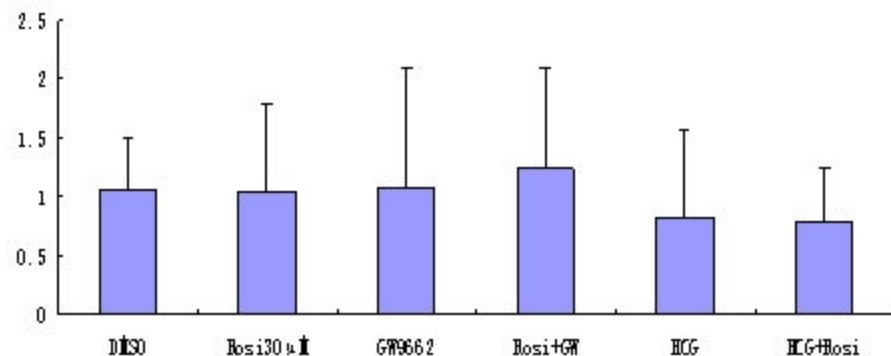**C** Relative expression of CYP11A1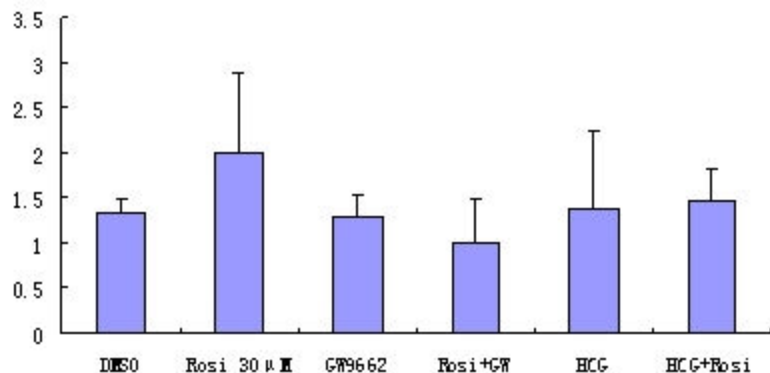**D** Relative expression of StAR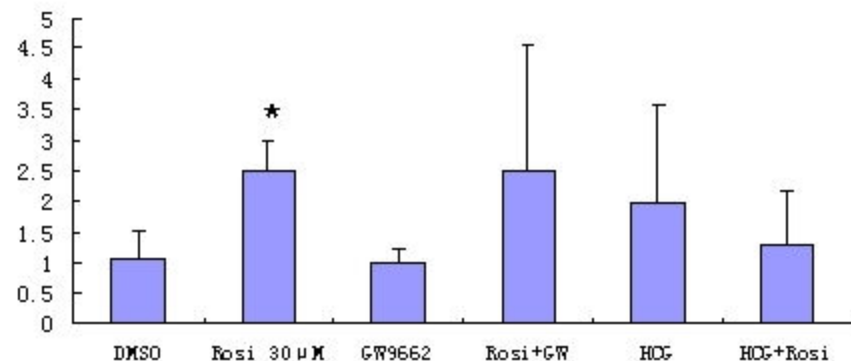

Supplement: MOESM2 [file 9568114]
